# Supplementary material for: Trends in healthcare utilization and costs associated with pneumonia in the United States during 2008–2014
Source: BMC Health Serv Res. 2018 Sep 14;18:715. doi: 10.1186/s12913-018-3529-4 (PMC6137867; doi:10.1186/s12913-018-3529-4)
Supplement: Supplementary file 1 — Table S1. International Classification of Diseases, 9th revision, Clinical Modification (ICD-9-CM) codes used. (DOCX 13 kb) [file 12913_2018_3529_MOESM1_ESM.docx]

**Table S1. International Classification of Diseases, 9th revision, Clinical Modification (ICD-9-CM) codes used**

| **Condition** | **Medical coding** | **ICD-9-CM code** |
| --- | --- | --- |
| Pneumonia | All pneumonia | 480-486 |
| Influenza with pneumonia | 487.0 |
| Meningitis | Meningitis due to other organisms | 321.xx |
| Tuberculous meningitis | 013.0 |
| Salmonella meningitis | 003.21 |
| Meningococcal meningitis | 036.0 |
| Meningococcal encephalitis | 036.1 |
| Meningitis due to enterovirus | 047.xx |
| Meningitis due to adenovirus | 049.1 |
| Herpes zoster with meningitis | 053.0 |
| Herpes simplex meningitis | 054.72 |
| Mumps meningitis | 072.1 |
| Acute syphilitic meningitis | 091.81 |
| Syphilitic meningitis | 094.2 |
| Gonococcal meningitis | 098.82 |
| Leptospiral meningitis (aseptic) | 100.81 |
| Candidal meningitis | 112.83 |
| Coccidioidal meningitis | 114.2 |
| Infection by Histoplasma capsulatum, meningitis | 115.01 |
| Infection by Histoplasma duboisii, meningitis | 115.11 |
| Histoplasmosis, unspecified, meningitis | 115.91 |
| Meningoencephalitis due to toxoplasmosis | 130.0 |
| Bacterial meningitis | 320.xx |
| Nonpyogenic meningitis | 322.0 |
| Meningitis, unspecified | 322.9 |
| Meningitis of unspecified cause | 322 |
| Septicemia | Salmonella septicemia | 003.1 |
| Septicemic plague | 020.2 |
| Anthrax septicemia | 022.3 |
| Disseminated due to other mycobacteria | 031.2 |
| Meningococcemia | 036.2 |
| Septicemia | 038.xx |
| Herpetic septicemia | 054.5 |
| Septic shock | 785.52 |
| Bacteremia | 790.7 |
| Sepsis | 995.91 |
| Severe sepsis | 995.92 |
| Empyema | Empyema | 510.xx |
